# Supplementary material for: Impact of COVID Pandemic on Financial Burdens in Metro and Non-Metro Regions: Findings from a Cross-Sectional Survey
Source: Research Square preprint supplement (doi:10.21203/rs.3.rs-6874039/v1), 2025-07-15
Supplement: Supplementary file 1 [file 3bc3efea2a1180caaf369fa4.docx]

**S1 Table.** Survey elements by core constructs

| **Survey elements by constructs** |
| --- |
| **Demographics**   - Neighborhood level: zip code, rural/urban - Individual level: age, gender, race/ethnicity, educational attainment, income, occupation, employment status, sexual orientation |
| **Perceived susceptibility**   - Perceived susceptibility to COVID-19 - Perceived susceptibility to preventable/early detected cancers - Perceived susceptibility to negative consequences associated with cancer diagnosis |
| **Perceived severity**   - Health consequences of COVID-19 - Perceived stigma related to COVID-19 diagnosis - Perceived financial impacts of COVID-19 |
| **Perceived barriers/benefits**   - Perceived stigma related to COVID-19 - Stress (including financial stressors), distress, discrimination/racism - Access to health information - Challenges related to social distancing (ability to get groceries, shortage of needed items, children home from school, ability to work from home, reduction of hours/pay, loss of employment, loss of health insurance) - Challenges related to the inability to engage in social distancing - Access to needed health services (not necessarily cancer related) – ability to get medications/get acute care, access & use of telehealth/phone visits - Ability to obtain cancer care (clinic visits, get recommended treatments, get recommended surveillance tests/procedures, modifications to regimens, participation/access to clinical trials, pain control/management) |
| **Cancer prevention and control behaviors**   - Tobacco use (including vaping, e-cig)/Environmental tobacco exposure - Physical activity/inactivity - Fruit/vegetable intake - Alcohol intake - Breast, cervical, colorectal screening - HPV vaccination - Adherence to treatment/surveillance |

**S2 Table**. Sensitivity analyses of associations between region of residence and impact of COVID-19 on employment

| **Impact of non-metro (vs. metro) on Employment** | **Crude** | **Adjusted*** | |
| --- | --- | --- | --- |
| **OR (95% CI)** | **OR (95% CI)** | |
| **Not having full-time or part-time employment prior to COVID** (n=6,123) |  |  | |
| Unemployed (n=139) | 1.31 (0.92, 1.87) | 1.17 (0.78, 1.76) | |
| Other‖ (n=648) | 1.39 (1.17, 1.66) | 1.18 (0.95, 1.46) | |
| Retired (n=1534) | 1.23 (0.99, 1.28) | 1.29 (1.05, 1.59) | |
| **Not having full-time or part-time employment prior to COVID§** (n=4,386) |  |  | |
| Other¶ (n=722) | 1.36 (1.15, 1.61) | 1.21 (0.98, 1.49) | |
| Retired (n=291) | 1.53 (1.2, 1.96) | 1.09 (0.8, 1.49) | |
| **Not having full-time or part-time employment prior to COVID§** (n=4,386) |  |  | |
| Unemployed (n=128) | 1.4 (0.97, 2.02) | 1.25 (0.82, 1.91) | |
| Other‖ (n=291) | 1.35 (1.12, 1.62) | 1.10 (0.87, 1.39) | |
| Retired (n=594) | 1.53 (1.2, 1.96) | 1.07 (0.78, 1.47) | |
| **Lost Job Due to COVID-19†§** (n=3,373) |  |  | |
| Yes | 1.07 (0.84, 1.35) | 0.83 (0.64, 1.09) | |
| **Not Currently Paid for a Full or Part-Time Job§** (n=4,386) |  |  | |
| Yes | 1.75 (1.53, 1.99) | 1.39 (1.18, 1.62) | |
| * Multivariate logistic regression models adjusted for age, sex, race-ethnicity, marital status, health insurance, education, state, household income, having prior cancer, number of adults and children in household, primary caregiver status, and health status; | | | |
| § Among participants under 65 years of age at time of survey; | | | |
| ¶ Other includes those who are unemployed, homemakers, students, disabled, and all other categories; | | |  |
| ‖ Other includes those who are homemakers, students, disabled, and all other categories; | | |  |
| † Among participants whose occupational status in February 2020 prior to the stay-at-home orders put in place were full-time or part-time employed; | | |  |

**S3 Table**. Full correlates between participant characteristics and financial concern score

|  | | **Predictors of financial concern score** | **Crude** | **Adjusted** | **Adjusted*** | |
| --- | --- | --- | --- | --- | --- | --- |
|  | | **Mean score§ (95% CI)** | **Mean score§ (95% CI)** | **RR (95% CI)** | |
| **Residence** | | Non-Metro | 2.85 (3.64, 3.13) | 3.64 (3.13, 4.23) | 0.94 (0.89, 1) | |
| Metro | 2.78 (3.85, 3.32) | 3.85 (3.32, 4.48) | Ref | |
| Age | | <35 | 5.01 (5.22, 4.45) | 5.22 (4.45, 6.14) | Ref | |
| 35-49 | 3.67 (4.71, 4.02) | 4.71 (4.02, 5.52) | 0.9 (0.83, 0.98) | |
| 50-59 | 2.98 (4.4, 3.77) | 4.4 (3.77, 5.14) | 0.84 (0.77, 0.92) | |
| 60-69 | 2.12 (2.99, 2.56) | 2.99 (2.56, 3.49) | 0.57 (0.52, 0.63) | |
| *70+* | 1.66 (2.28, 1.91) | 2.28 (1.91, 2.71) | 0.44 (0.38, 0.5) | |
| Race/Ethnicity | | Black non-Hispanic | 4.88 (3.77, 3.19) | 3.77 (3.19, 4.45) | 1.16 (1.06, 1.28) | |
| Hispanic | 5.33 (4.02, 3.33) | 4.02 (3.33, 4.86) | 1.24 (1.09, 1.42) | |
| Other non-Hispanic | 4.66 (4.01, 3.39) | 4.01 (3.39, 4.73) | 1.24 (1.12, 1.37) | |
| White non-Hispanic | 2.52 (3.24, 2.8) | 3.24 (2.8, 3.75) | Ref | |
| Sex | | Female | 2.92 (3.8, 3.28) | 3.8 (3.28, 4.4) | 1.03 (0.97, 1.09) | |
| Male | 2.55 (3.69, 3.16) | 3.69 (3.16, 4.31) | Ref | |
| Education | | Highschool or less | 4.09 (3.98, 3.39) | 3.98 (3.39, 4.68) | Ref | |
| Some college/Associate’s degree | 3.56 (4.09, 3.52) | 4.09 (3.52, 4.77) | 1.03 (0.95, 1.12) | |
| Bachelor's degree | 2.41 (3.56, 3.04) | 3.56 (3.04, 4.16) | 0.89 (0.81, 0.98) | |
| Master's degree or higher | 1.96 (3.39, 2.91) | 3.39 (2.91, 3.95) | 0.85 (0.77, 0.94) | |
| Income | | <$35K | 5.5 (5.01, 4.31) | 5.01 (4.31, 5.82) | Ref | |
| $35K-$49,999 | 4.11 (4.35, 3.72) | 4.35 (3.72, 5.09) | 0.87 (0.79, 0.95) | |
| $50K-$74,999 | 3.15 (3.58, 3.05) | 3.58 (3.05, 4.21) | 0.72 (0.65, 0.78) | |
| $75K+ | 1.91 (2.52, 2.14) | 2.52 (2.14, 2.96) | 0.5 (0.46, 0.55) | |
| Marital status | | Widowed, separated, divorced, or other | 4.31 (3.91, 3.34) | 3.91 (3.34, 4.58) | 1.05 (0.97, 1.13) | |
| Single, never been married | 3.41 (3.6, 3.06) | 3.6 (3.06, 4.24) | 0.97 (0.88, 1.06) | |
| Married/living as married | 2.51 (3.73, 3.22) | 3.73 (3.22, 4.32) | Ref | |
| Insurance | | No insurance | 6.46 (4.55, 3.85) | 4.55 (3.85, 5.38) | 1.37 (1.22, 1.53) | |
| Public and Private | 2.03 (3.33, 2.83) | 3.33 (2.83, 3.92) | 1 (0.91, 1.1) | |
| Public only | 4.77 (3.91, 3.33) | 3.91 (3.33, 4.58) | 1.18 (1.08, 1.28) | |
| Private only | 2.48 (3.32, 2.85) | 3.32 (2.85, 3.88) | Ref | |
| State | | Indiana | 2.74 (3.57, 2.91) | 3.57 (2.91, 4.38) | 0.91 (0.77, 1.08) | |
| Ohio | 2.79 (3.92, 3.46) | 3.92 (3.46, 4.45) | Ref | |
| Previous cancer | | Yes | 2.5 (3.53, 3.03) | 3.53 (3.03, 4.12) | 0.89 (0.84, 0.94) | |
| No | 3.09 (3.97, 3.42) | 3.97 (3.42, 4.6) | Ref | |
| Primary caregiver | | Other | 5.88 (3.74, 2.64) | 3.74 (2.64, 5.29) | 1.11 (0.79, 1.56) | |
| Yes | 4.03 (4.18, 3.69) | 4.18 (3.69, 4.74) | 1.25 (1.14, 1.36) | |
| No | 2.68 (3.36, 3.04) | 3.36 (3.04, 3.71) | Ref | |
| Health status | | Poor | 5.18 (5.05, 4.25) | 5.05 (4.25, 6) | 1.82 (1.57, 2.09) | |
| Fair | 4.17 (4.55, 3.91) | 4.55 (3.91, 5.3) | 1.64 (1.46, 1.84) | |
| Good | 2.97 (3.86, 3.32) | 3.86 (3.32, 4.49) | 1.39 (1.25, 1.54) | |
| Very good | 2.11 (2.99, 2.56) | 2.99 (2.56, 3.49) | 1.07 (0.97, 1.19) | |
| Excellent | 1.97 (2.78, 2.33) | 2.78 (2.33, 3.31) | Ref | |
| § Score includes worried about 1) personal financial loss, 2) making rent or mortgage payment, 3) providing for yourself or your family, 4) not having enough food for yourself or your family, and 5) not having enough basic supplies. The model outcome was total score defined by the sum of all five financial factors (0-15) | | | | |
| * Multivariate Poisson regression models with robust variance adjusted for all other covariates in this table: age, sex, race-ethnicity, marital status, health insurance, education, state, household income, having prior cancer, number of adults and children in household [RR (95%CI)= 1.03(1.02-1.05) and 1.06(1.03-1.09), respectively], primary caregiver status, and health status; | | | | |
|  | | | | |
